# Supplementary material
Source: Springer Nature journal article supplement (https://www.springermedizin.de/resource/supplementary/13045_2013_355_MOESM14_ESM.pdf/9661200)

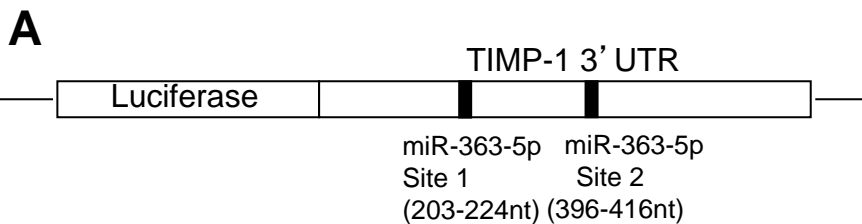

**TIMP1 UTR miR-363-5p site1**

miR-363-5p: AACGUAGCACUAGGUGGG  
 WT UTR1: TTCCCTGTTTATCCATCC  
 MUT1 UTR: TTCCCTGTTT**AGGTGGC**

**TIMP1 UTR miR-363-5p site2**

miR-363-5p: UUUAACGUAGCACUAGGUGGG  
 WT UTR2: AGCCTGCACAGTG-TCCACCC  
 MUT2 UTR: AGCCTGCACAGTG-**GTGGCC**

**B**

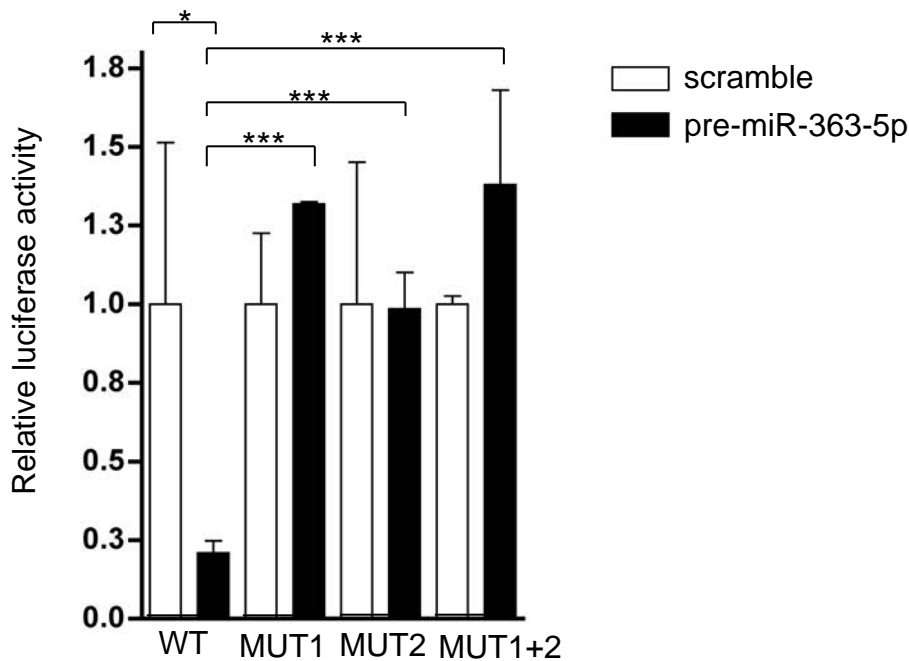

Supplement: MOESM14 [file 9661200]
